# Supplementary material
Source: Springer Nature journal article supplement (https://www.springermedizin.de/resource/supplementary/12955_2010_761_MOESM2_ESM.pdf/9560936)
Supplement: MOESM2 [file 9560936]

**1) Choice of three health professionals trained in applying the ICF and linking rules who linked PROs independently**

**2) Linking concepts contained in health status measures to the ICF/ICF-CY categories**

**3) Identification of meaningful concepts contained within the items of the measures and translation of meaningful concepts into corresponding categories**

**4) Discussion of linking process, especially disagreements among the linking persons**

**5) Concepts that could not be linked to the ICF/ICF-CY were documented in two ways**

**“Not definable (nd)”**

**If it was not possible to specify sufficiently which category to use, not being precise enough to be linked (e.g. concepts such as ‘physical disability or ‘health’)**

**“Not covered (nc)”**

**If a concept was not represented by the ICF/ICF-CY, e.g. related to “personal factors” (e.g. sex, gender, education), “disease conditions” or “diagnoses**
